# Supplementary material for: Synthesis, dual mode luminescence and down-conversion based thermometric properties of novel Y2−x−yLaCaGa3ZrO12:xEr3+, yYb3+ phosphors
Source: Royal Society of Chemistry journal article supplement (doi:10.1039/d4tc00852a), 2024-01-01
Supplement: d4tc00852a1.pdf [file d4tc00852a1.pdf]

Synthesis, dual mode luminescence and down-conversion based thermometric properties of the novel  $Y_{2-x-y}LaCaGa_3ZrO_{12}:xEr^{3+},yYb^{3+}$  phosphors

Zhurong Mo<sup>a</sup>, Hongli Wen<sup>a,c,\*</sup>, Xin Gao<sup>a</sup>, Chonge Ta<sup>a</sup>, Zhongfei Mu<sup>b,\*</sup>, E.A. Dawi<sup>d</sup>,  
Deshmukh Abdul Hakeem<sup>e,\*</sup>

<sup>a</sup>*Key Laboratory of Clean Chemistry Technology of Guangdong Regular Higher Education Institutions, Guangdong Engineering Technology Research Center of Modern Fine Chemical Engineering, School of Chemical Engineering and Light Industry, Guangdong University of Technology, Guangzhou 510006, China*

<sup>b</sup>*Experimental Teaching Department, Guangdong University of Technology, Guangzhou, 510006, China*

<sup>c</sup>*Guangdong Provincial Laboratory of Chemistry and Fine Chemical Engineering Jieyang Center, Jieyang 515200, China*

<sup>d</sup>*Department of Mathematics and Sciences, College of Humanities and Sciences, Ajman University, P.O. Box 346, Ajman, UAE*

<sup>e</sup>*Department of Physics, United Arab Emirates University, Al-Ain 15551, Abu Dhabi, UAE*

\*Corresponding author:

E-mail addresses: hongliwen@gdut.edu.cn (H. Wen); muzhongfei@gdut.edu.cn (Z. Mu); abdulhakeem.desh@uaeu.ac.ae (D. A. Hakeem)

Table S1. Crystallite size values of the  $Y_{2-x}LaCaGa_3ZrO_{12}:xEr^{3+}$  and  $Y_{1.92-y}LaCaGa_3ZrO_{12}:0.08Er^{3+},yYb^{3+}$  phosphors.

| $Y_{2-x}LaCaGa_3ZrO_{12}:xEr^{3+}$ |                       | $Y_{1.92-y}LaCaGa_3ZrO_{12}:0.08Er^{3+},yYb^{3+}$ |                       |
|------------------------------------|-----------------------|---------------------------------------------------|-----------------------|
| Sample                             | Crystallite size (nm) | Sample                                            | Crystallite size (nm) |
| $x = 0$                            | 50.6                  | $y = 0$                                           | 45.6                  |
| $x = 0.02$                         | 43.3                  | $y = 0.05$                                        | 55.7                  |
| $x = 0.04$                         | 50.6                  | $y = 0.1$                                         | 55.5                  |
| $x = 0.06$                         | 53.2                  | $y = 0.2$                                         | 43.3                  |
| $x = 0.08$                         | 45.6                  | $y = 0.3$                                         | 41.0                  |
| $x = 0.1$                          | 43.4                  | $y = 0.5$                                         | 55.5                  |

Table S2. Comparison between the thermometric parameters ( $S_A$  and  $S_R$ ) of the  $Y_{1.92}LaCaGa_3ZrO_{12}:0.08Er^{3+}$  and  $Y_{1.72}LaCaGa_3ZrO_{12}:0.08Er^{3+}, 0.2Yb^{3+}$  based thermometer with thermometers reported in the literature.

|    | Host                                               | Excitation (nm) | Temperature range (K)  | $S_A (\times 10^{-4} K^{-1})$ | $S_R (\%K^{-1})$             | Reference |
|----|----------------------------------------------------|-----------------|------------------------|-------------------------------|------------------------------|-----------|
| 1  | $Y_{1.92}LaCaGa_3ZrO_{12}:0.08Er^{3+}$             | 980             | 200-300 K<br>300-525 K | 16 (300 K)<br>18 (425 K)      | 2.94 (200 K)<br>0.97 (300 K) | This work |
| 2  | $Y_{1.72}LaCaGa_3ZrO_{12}:0.08Er^{3+}, 0.2Yb^{3+}$ | 980             | 200-300 K<br>300-525 K | 13 (300 K)<br>15.8 (500 K)    | 3.02 (200 K)<br>0.97 (300 K) | This work |
| 3  | $Ca_3Y_2Ge_3O_{12}:Er^{3+}, Yb^{3+}$               | 980             | 293-463 K              | 20 (463 K)                    | 1.29 (463 K)                 | 1         |
| 4  | $LaNbO_4:Er^{3+}, Yb^{3+}$                         | 980             | 303-453 K              | -                             | 1.2 (303 K)                  | 2         |
| 5  | $Ba_2SrLu_4O_9:Yb^{3+}/Er^{3+}$                    | 980             | 303-573                | 46 (573 K)                    | 0.99 (313 K)                 | 3         |
| 6  | $Al_2Mo_3O_{12}:Er^{3+}, Yb^{3+}$                  | 980             | 303-603                | 111                           | 1.09                         | 4         |
| 7  | $Sr_2YTaO_6:Er^{3+}, Yb^{3+}$                      | 980             | 293-473 K              | 0.078 (473 K)                 | 1.32 (293K)                  | 5         |
| 8  | $PbZrTiO_3:Er^{3+}, Yb^{3+}$                       | 980             | 270-575                | 15 (323 K)                    | -                            | 6         |
| 9  | $Ba_5Y_8Zn_4O_{21}:Er^{3+}, Yb^{3+}$               | 980             | 293-563                | 39 (563 K)                    | 1.36 (293 K)                 | 7         |
| 10 | $Y_4GeO_8:Er^{3+}, Yb^{3+}$                        | 980             | 303-573 K              | 45.5 (303 K)                  | 1.152                        | 8         |
| 11 | $Ca_2MgWO_6:Er^{3+}, Yb^{3+}$                      | 980             | 303-573 K              | 82 (303 K)                    | 0.92                         | 9         |
| 12 | $NaY(WO_4)_2:Er^{3+}, Yb^{3+}$                     | 980             | 293-503                | 90 (503)                      | 1.2 (293 K)                  | 10        |
| 13 | $\beta-NaY_{0.8}Gd_{0.2}F_4:Eu^{3+}/Dy^{3+}$       | 250             | 303-563                | 23                            | -                            | 11        |
| 14 | $SrLaLiTeO_6:Er^{3+}$                              | 379             | 298-573                | 70.4                          | 1.20                         | 12        |
| 15 | $Bi_4Ti_3O_{12}:Pr^{3+}/Er^{3+}$                   | 481             | 298-568                | 20 (568 K)                    | 1.03                         | 13        |
| 16 | $Ca_2YZr_2Al_3O_{12}:Bi^{3+}, Eu^{3+}$             | 278             | 297-573 K              | 82.6                          | 0.664                        | 14        |
| 17 | $Ba_2LaNbO_6:Mn^{4+}, Eu^{3+}$                     | 396             | 298-498                | -                             | 2.08                         | 15        |
| 18 | $Ca_2LaNbO_6:Mn^{4+}, Eu^{3+}$                     | 396             | 298-498                | -                             | 1.51                         | 15        |
| 19 | $(Ca,Sr)_{10}Li(PO_4)_7:Ce^{3+}, Mn^{2+}$          | 310             | 293-473                | -                             | 0.40 (473 K)                 | 16        |
| 20 | $KYb_2F_7:Er^{3+}$                                 | 980             | 300-600                | 140 (300 K)                   | 0.45 (590 K)                 | 17        |
| 21 | $GaN:Er^{3+}, Yb^{3+}$                             | 980             | 200-300                | 15 (200 K)                    | -                            | 18        |
| 22 | $LaF_3:Er^{3+}, Yb^{3+}$                           | 980             | 300-325                | 15.7 (386 K)                  | 0.88 (300 K)                 | 19        |

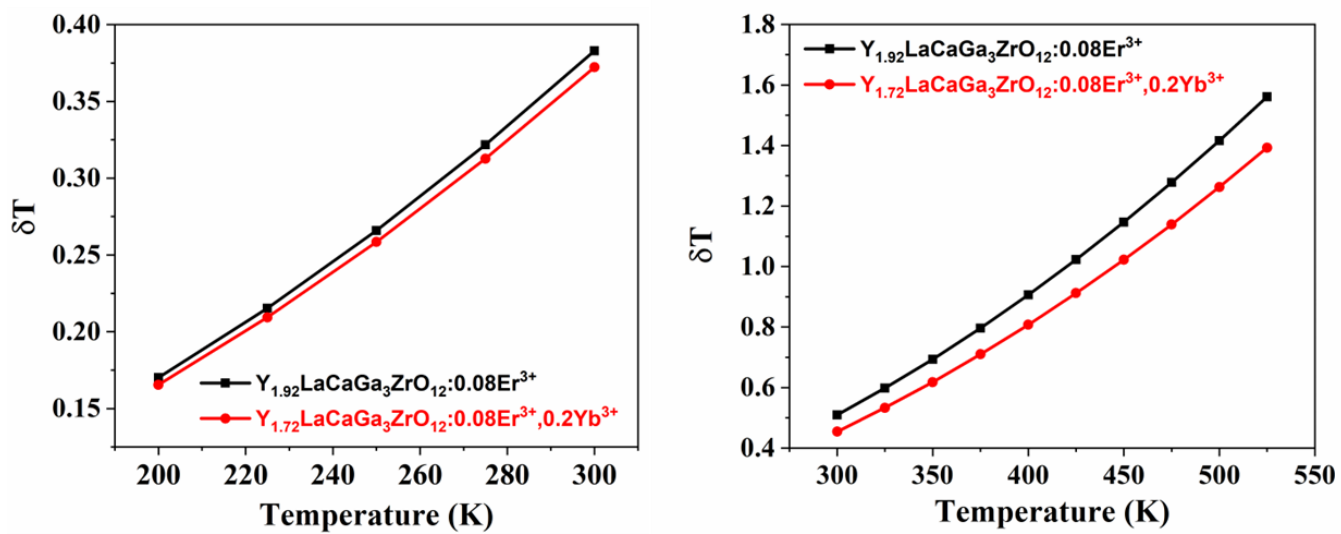

Fig. S1 Temperature uncertainty ( $\delta T$ ) of the  $Y_{1.92}LaCaGa_3ZrO_{12}:0.08Er^{3+}$  and  $Y_{1.72}LaCaGa_3ZrO_{12}:0.08Er^{3+}, 0.2Yb^{3+}$  measured for 200-300 K (left) and 300-500 K (right) temperature range.

## References

1. X. Chen, Y. Zhang, Y. Bu, Y. Chen, Y. Chen, J. Fu, J. Li and D. Deng, *Journal of Luminescence*, 2023, **261**, 119907.
2. X. Yang, Y. Zhu, T. Li, S. Long and B. Wang, *Ceramics International*, 2023, **49**, 21932-21940.
3. J. Hu, X. Zhang, H. Zheng, F. Lu, X. Peng, R. Wei, F. Hu and H. Guo, *Ceramics International*, 2022, **48**, 3051-3058.
4. H. Lv, L. Liu, D. Wang, Z. Mai, F. Yan, G. Xing and P. Du, *Journal of Luminescence*, 2022, **252**, 119333.
5. Y. Bu, Y. Chen, X. Chen, Y. Zhang, D. Deng, Y. Shen, L. Zhou and C. Xu, *Journal of Luminescence*, 2022, **248**, 118923.
6. P. P. Sukul, H. Swart and K. Kumar, *Luminescence*, 2023, **38**, 1221-1229
7. J. Chen, W. Zhang, S. Cui, X. Peng, F. Hu, R. Wei, H. Guo and D. Huang, *Journal of Alloys and Compounds*, 2021, **875**, 159922.
8. Y. Chen, J. Chen, Y. Tong, W. Zhang, X. Peng, H. Guo and D. Huang, *Journal of Rare Earths*, 2021, **39**, 1512-1519.
9. Y. Jiang, Y. Tong, S. Chen, W. Zhang, F. Hu, R. Wei and H. Guo, *Chemical Engineering Journal*, 2021, **413**, 127470.
10. M. Lin, L. Xie, Z. Wang, B. S. Richards, G. Gao and J. Zhong, *Journal of Materials Chemistry C*, 2019, **7**, 2971-2977.
11. J. H. Mingye Ding, Zebo Cui, Haobo Gao, Chunhua Lu, Junhua Xi, Zhenguo Ji, Daqin Chen, *Ceram. Int.*, 2018, **44**, 7930-7938.
12. J. Zhu, T. Yang, H. Li, Y. Xiang, R. Song, H. Zhang and B. Wang, *Chemical Engineering Journal*, 2023, **471**, 144550.
13. Y. H. C Wang, E Heydari, X Yang, S Xu, G Bai, *Ceram. Int.*, 2022, **48**, 12578-12584.
14. Z. Zheng, J. Zhang, X. Liu, R. Wei, F. Hu and H. Guo, *Ceramics International*, 2020, **46**, 6154-6159.
15. P. Wang, J. Mao, L. Zhao, B. Jiang, C. Xie, Y. Lin, F. Chi, M. Yin and Y. Chen, *Dalton Trans*, 2019, **48**, 10062-10069.
16. J. X. X. Zhang, Z. Guo, and M. Gong, *Ind. Eng. Chem. Res.*, 2017, **56**, 890-898.
17. J. Cao, F. Hu, L. Chen, H. Guo, C. Duan and M. Yin, *Journal of Alloys and Compounds*, 2017, **693**, 326-331.
18. N. Hamza Belkhir, A. Toncelli, A. K. Parchur, E. Alves and R. Maalej, *Sensors and Actuators B: Chemical*, 2017, **248**, 769-776.
19. X. Cheng, X. Ma, H. Zhang, Y. Ren and K. Zhu, *Physica B: Condensed Matter*, 2017, **521**,

270-274.
